# Supplementary material for: Tuning the Cytotoxicity of Bis-Phosphino-Amines Ruthenium(II) Para-Cymene Complexes for Clinical Development in Breast Cancer
Source: MDPI journal article supplement (doi:10.3390/pharmaceutics13101559), 2021-09-26
Supplement: s1 [file s1]

# Supplementary Materials: Tuning the Cytotoxicity of bis-phosphino-amines Ruthenium(II) para-cymene complexes for clinical development in Breast Cancer

Elena Domínguez-Jurado, Francisco J. Cimas, José Antonio Castro-Osma, Alberto Juan, Agustín Lara-Sánchez, Antonio Rodríguez-Diéguez, Alexandr Shafir, Alberto Ocaña and Carlos Alonso-Moreno

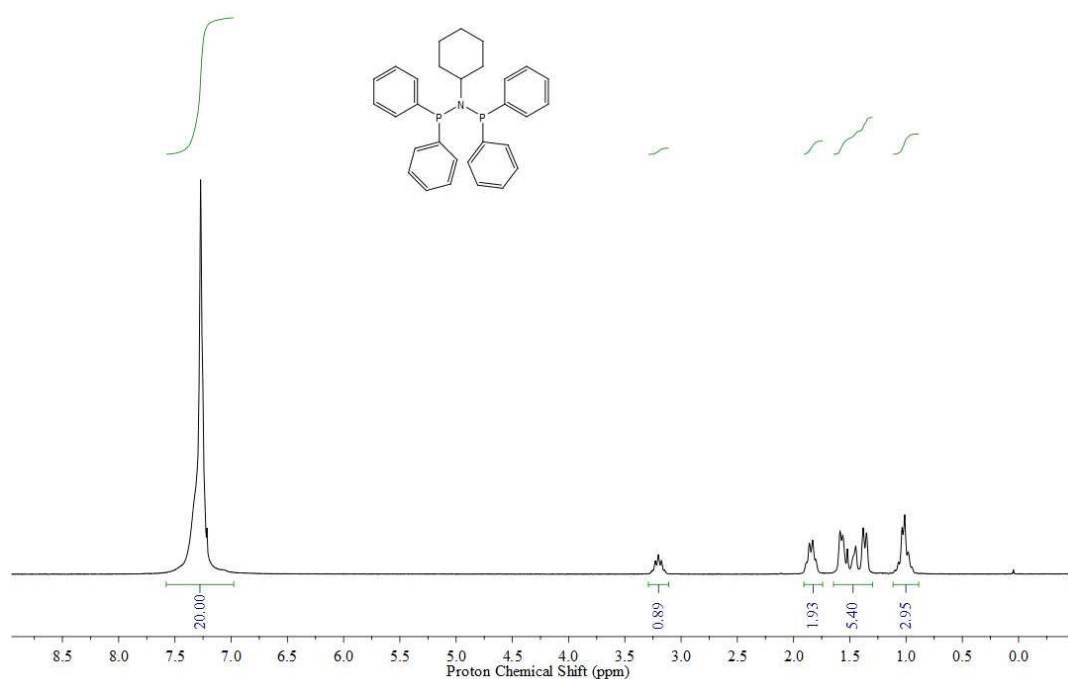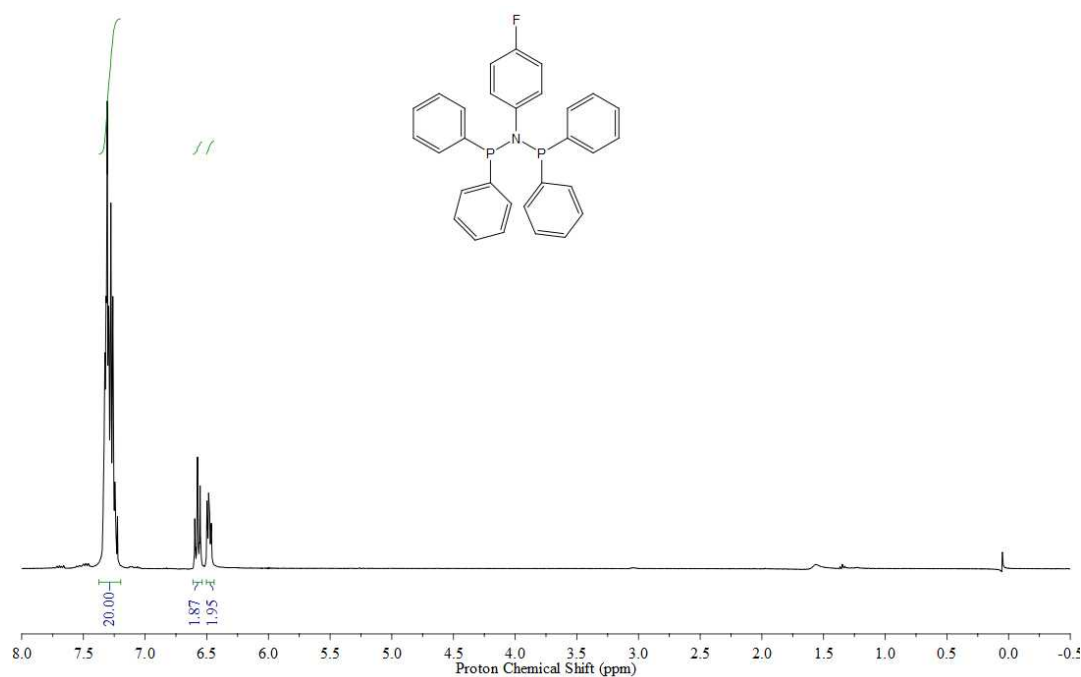

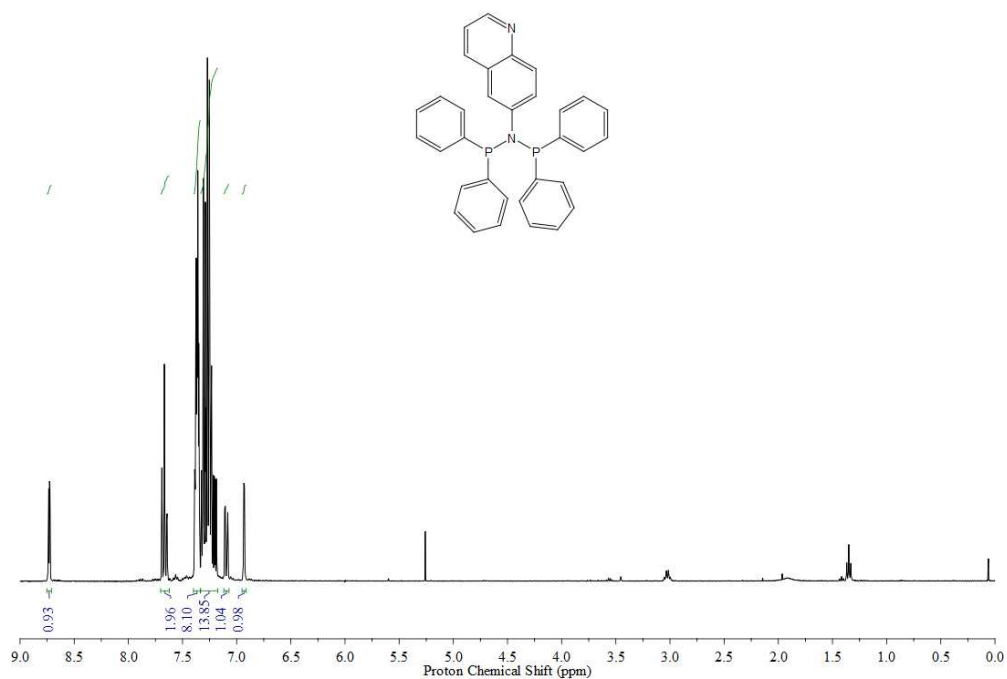

**Figure S1.**  $^1\text{H}$  NMR (400 MHz) spectrum of Ligands L3 ( $\{\text{Ph}_2\text{P}\}_2\text{N}\{\text{C}_6\text{H}_{11}\}$ ), L6 ( $\{\text{Ph}_2\text{P}\}_2\text{N}\{\text{C}_6\text{H}_4\text{F}\}$ ) and L9 ( $\{\text{Ph}_2\text{P}\}_2\text{N}\{\text{C}_9\text{H}_6\text{N}\}$ ) in  $\text{CDCl}_3$ .

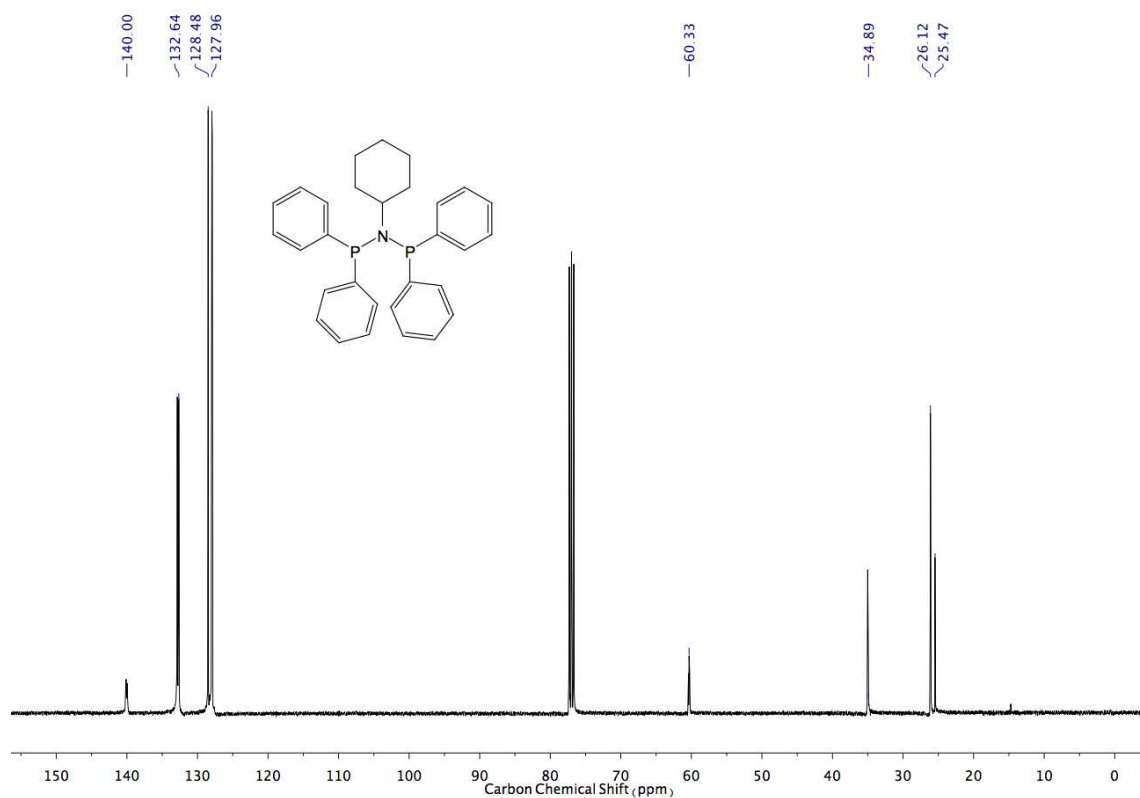

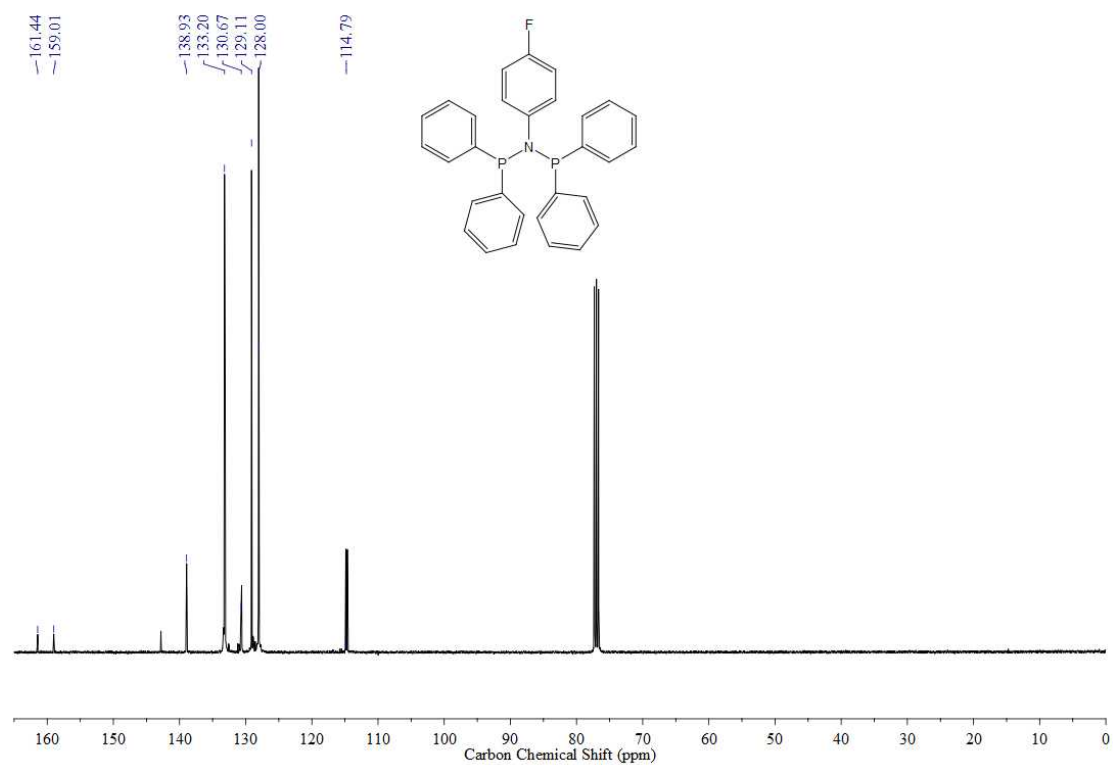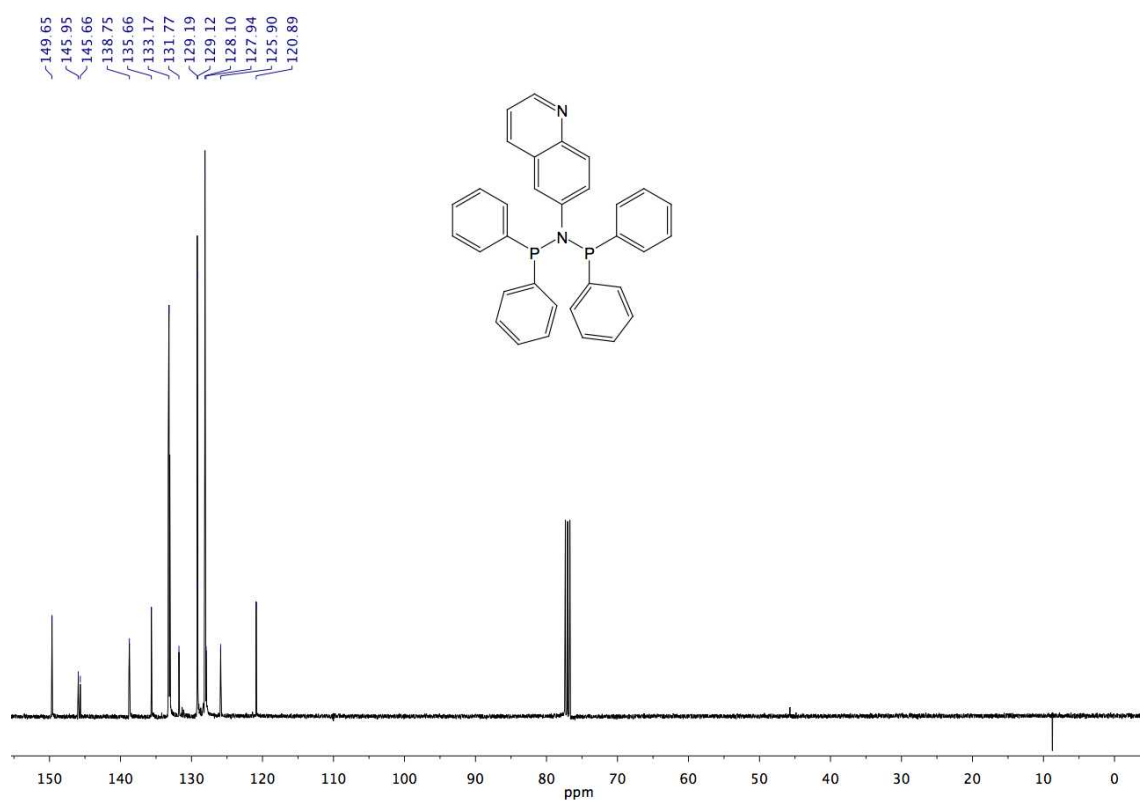

**Figure S2.** <sup>13</sup>C NMR (100 MHz) spectrum of Ligands L3 ( $(\text{Ph}_2\text{P})_2\text{N}(\text{C}_6\text{H}_{11})$ ), L6 ( $(\text{Ph}_2\text{P})_2\text{N}(\text{C}_6\text{H}_4\text{F})$ ) and L9 ( $(\text{Ph}_2\text{P})_2\text{N}(\text{C}_6\text{H}_5)_3$ ) in  $\text{CDCl}_3$ .

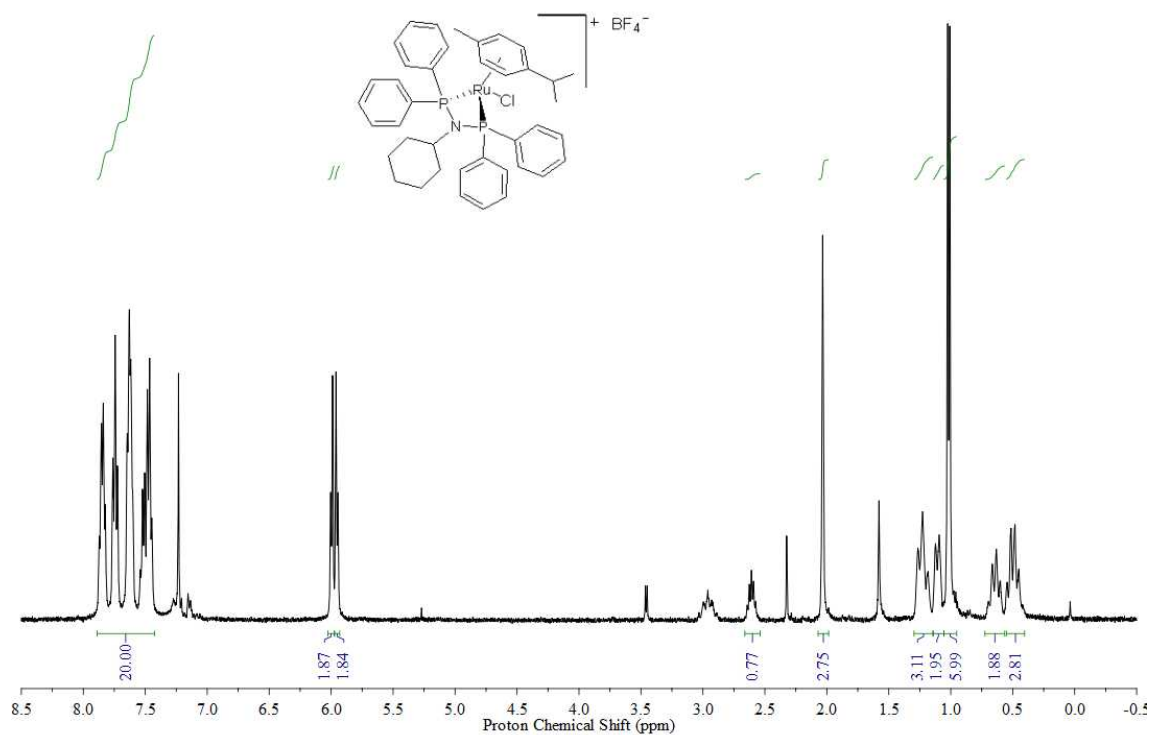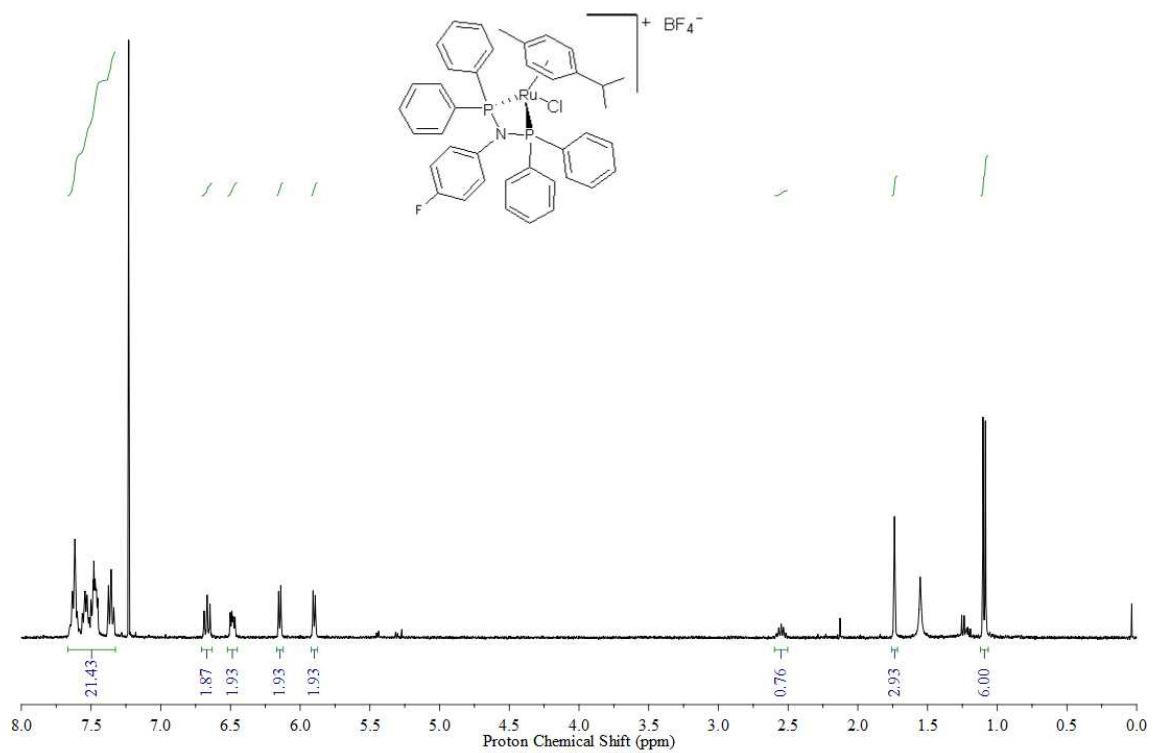

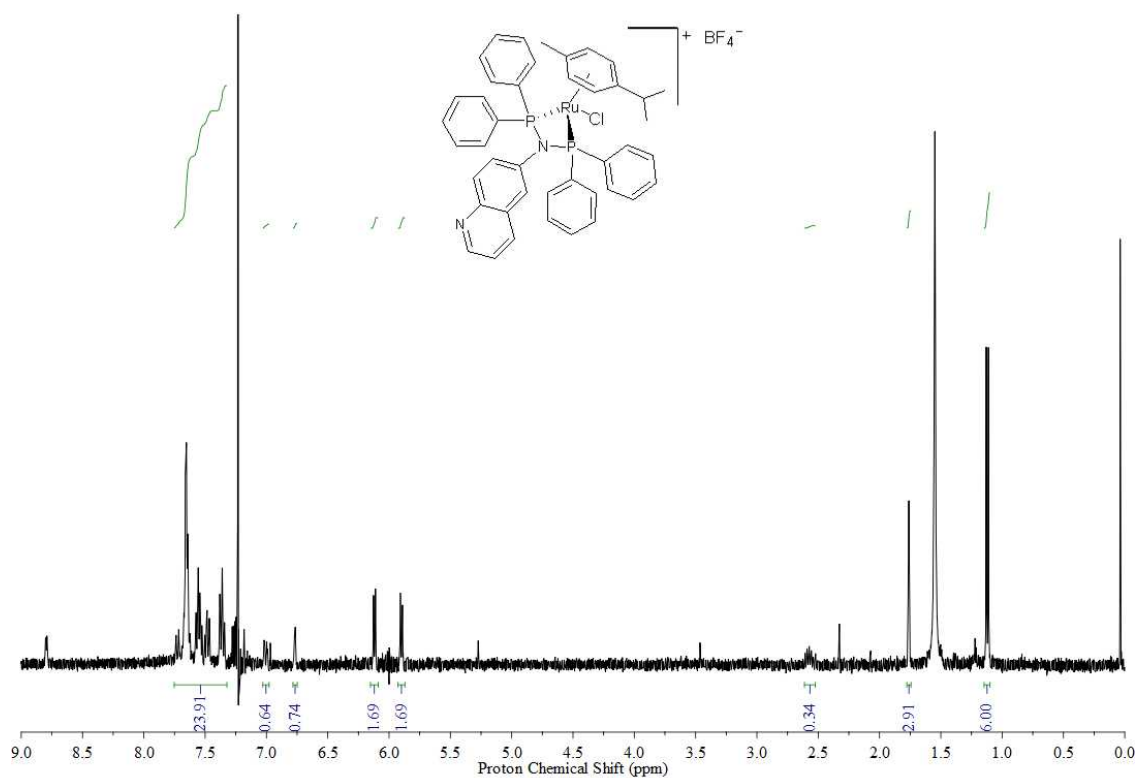

**Figure S3.**  $^1\text{H}$  NMR (400 MHz) spectrum of Complexes Ru3 ( $[\text{RuCl}(\text{p-cym})((\text{Ph}_2\text{P})_2\text{N}(\text{C}_6\text{H}_{11}))][\text{BF}_4]$ ), Ru6 ( $[\text{RuCl}(\text{p-cym})((\text{Ph}_2\text{P})_2\text{N}(\text{C}_6\text{H}_4\text{F}))][\text{BF}_4]$ ) and Ru9 ( $[\text{RuCl}(\text{p-cym})((\text{Ph}_2\text{P})_2\text{N}(\text{C}_9\text{H}_6\text{N}))][\text{BF}_4]$ ) in  $\text{CDCl}_3$ .

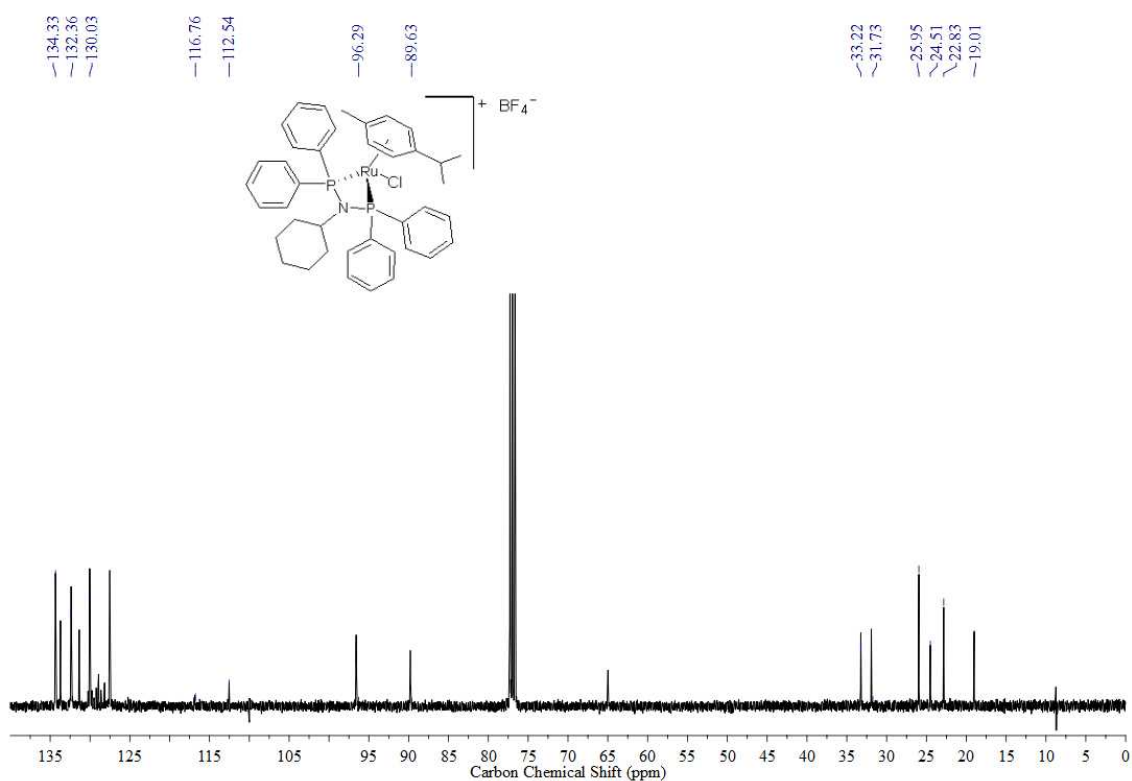

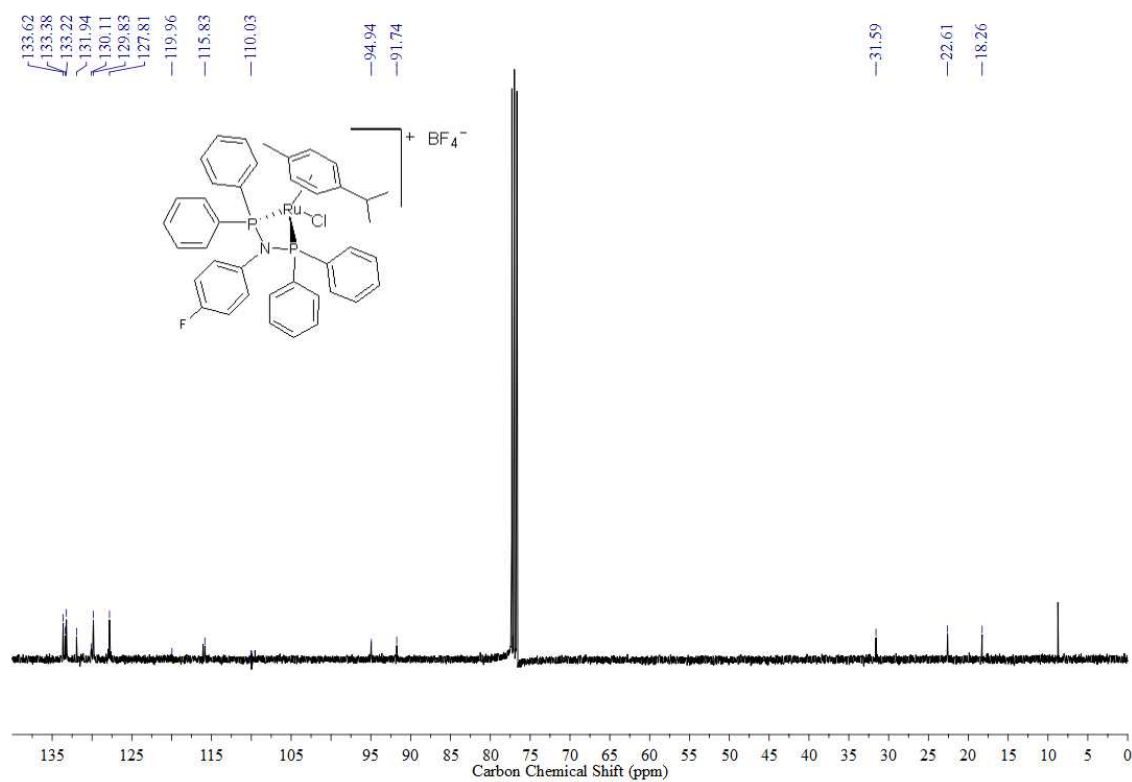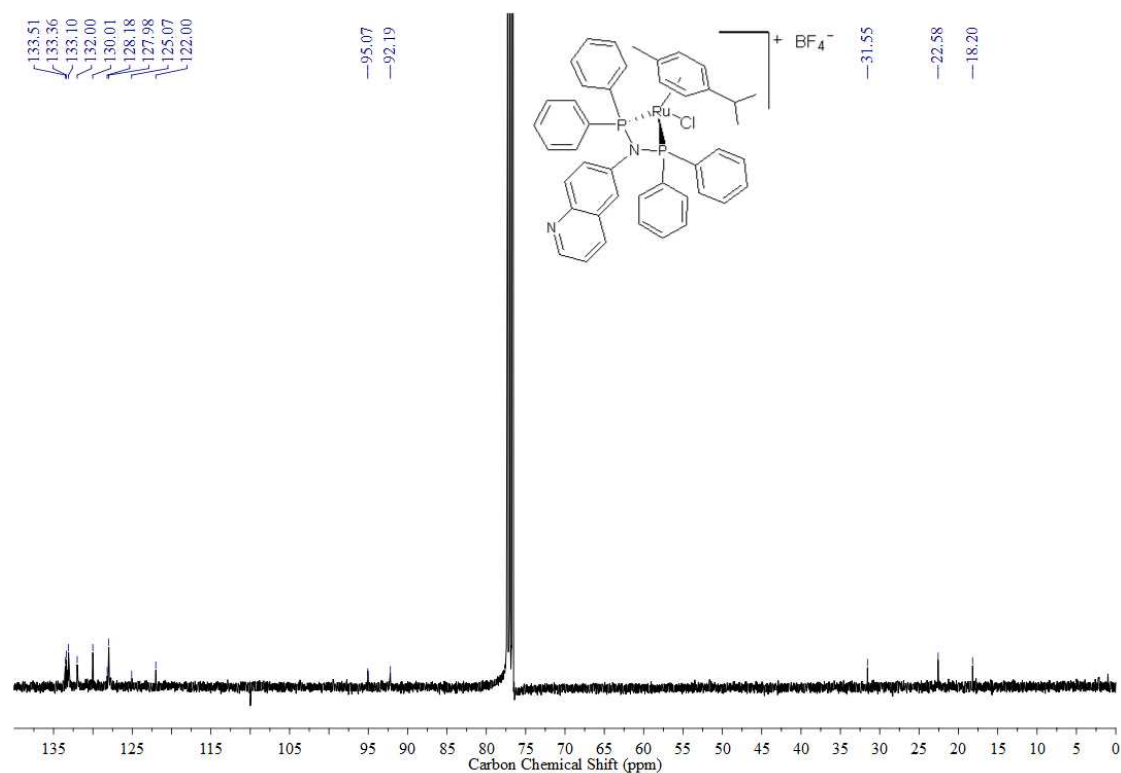

**Figure S4.** <sup>13</sup>C NMR (100 MHz) spectrum of Complexes Ru3 ([RuCl(p-cym)((Ph<sub>2</sub>P)<sub>2</sub>N{C<sub>6</sub>H<sub>11</sub>})][BF<sub>4</sub>]), Ru6 ([RuCl(p-cym)((Ph<sub>2</sub>P)<sub>2</sub>N{C<sub>6</sub>H<sub>4</sub>F})][BF<sub>4</sub>]) and Ru9 ([RuCl(p-cym)((Ph<sub>2</sub>P)<sub>2</sub>N{C<sub>9</sub>H<sub>6</sub>N})][BF<sub>4</sub>]) in CDCl<sub>3</sub>.

**Muestra** Ru1 disuelta 1mg/mL en DCM. Dilucion 5:1000 con MeOH  
**Nombre registro** D:\Data\2021\2021\_09 SEPTIEMBRE\MAX4155\_5\_01\_3309.d  
**Metodo** ESI Positive fia esi + 50-2000.m  
**Ref archivo** MAX4155

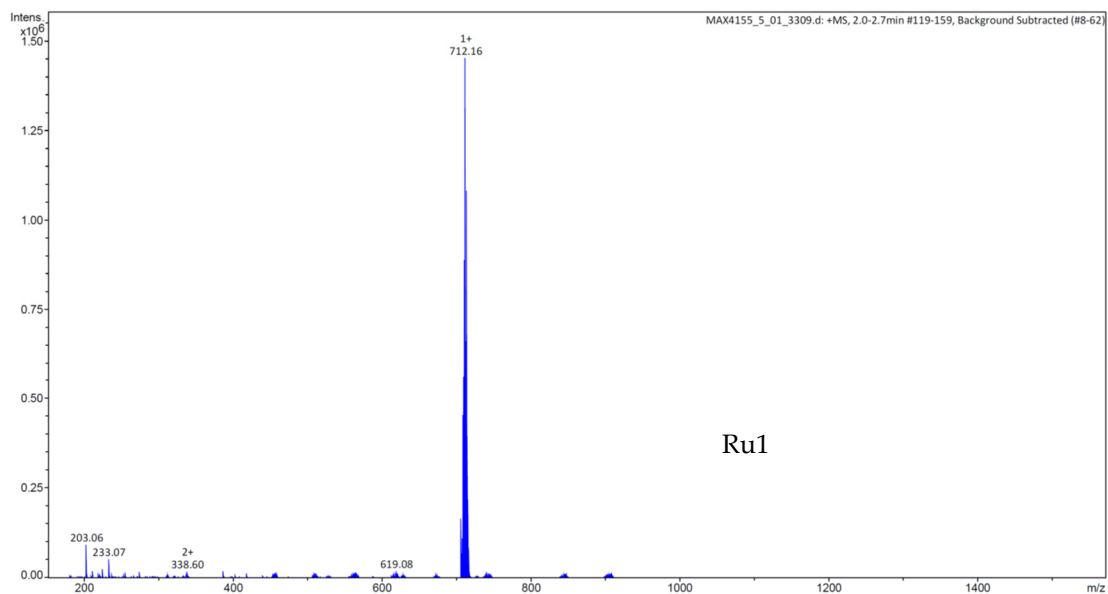

**Muestra** Ru2 disuelta 1mg/mL en DCM. Dilucion 5:1000 con MeOH  
**Nombre registro** D:\Data\2021\2021\_09 SEPTIEMBRE\MAX4156\_6\_01\_3310.d  
**Metodo** ESI Positive fia esi + 50-2000.m  
**Ref archivo** MAX4156

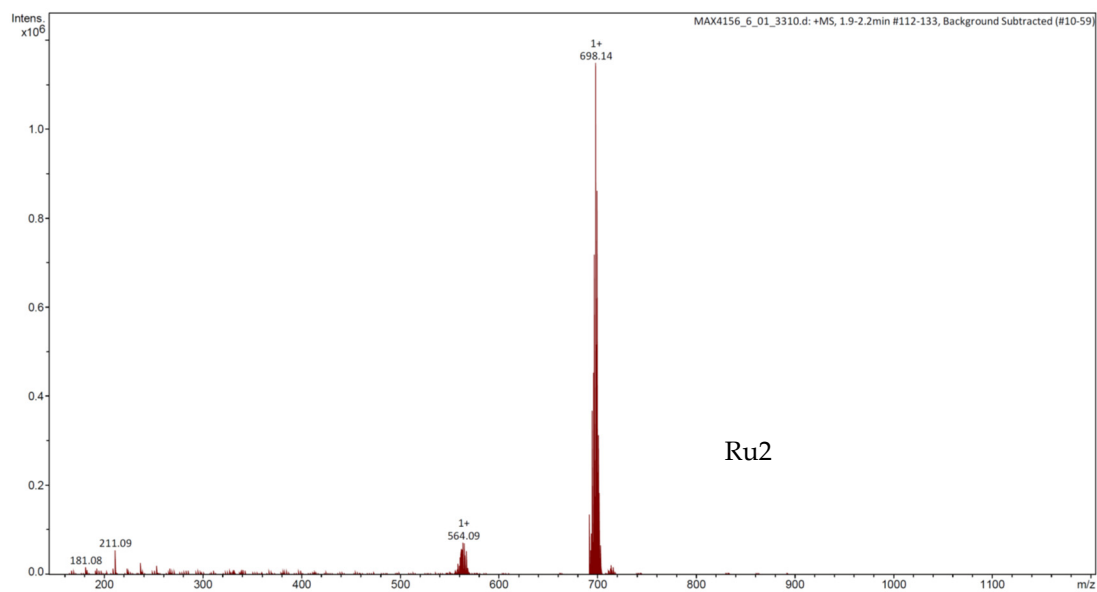

Muestra Ru3 disuelta 1mg/mL en DCM. Dilucion 5:1000 con MeOH  
 Nombre registro D:\Data\2021\2021\_09 SEPTIEMBRE\MAX4157\_7\_01\_3311.d  
 Metodo ESI Positive fia esi + 50-2000.m  
 Ref archivo MAX4157

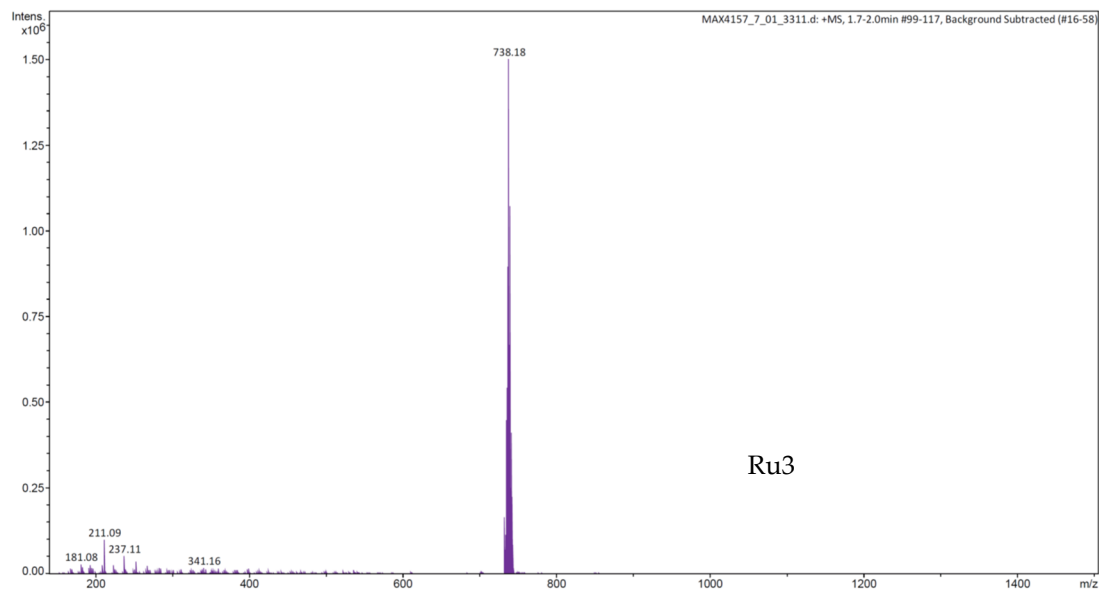

**Figure S5.** MS(ESI) spectra for Ru1 [RuCl(p-cym)((Ph<sub>2</sub>P)<sub>2</sub>N{C<sub>4</sub>H<sub>9</sub>})][BF<sub>4</sub>] (Ru1), Ru2 [RuCl(p-cym)((Ph<sub>2</sub>P)<sub>2</sub>N{C<sub>3</sub>H<sub>7</sub>})][BF<sub>4</sub>], and Ru3 [RuCl(p-cym)((Ph<sub>2</sub>P)<sub>2</sub>N{C<sub>6</sub>H<sub>11</sub>})][BF<sub>4</sub>].

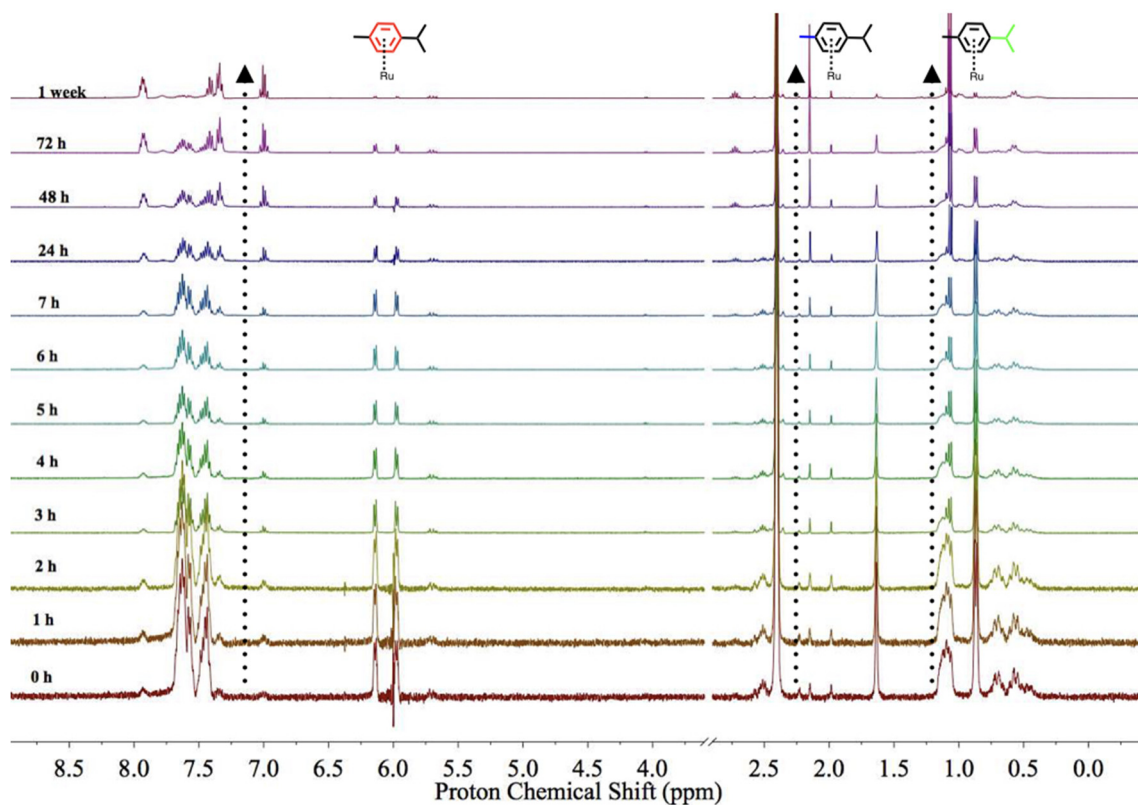



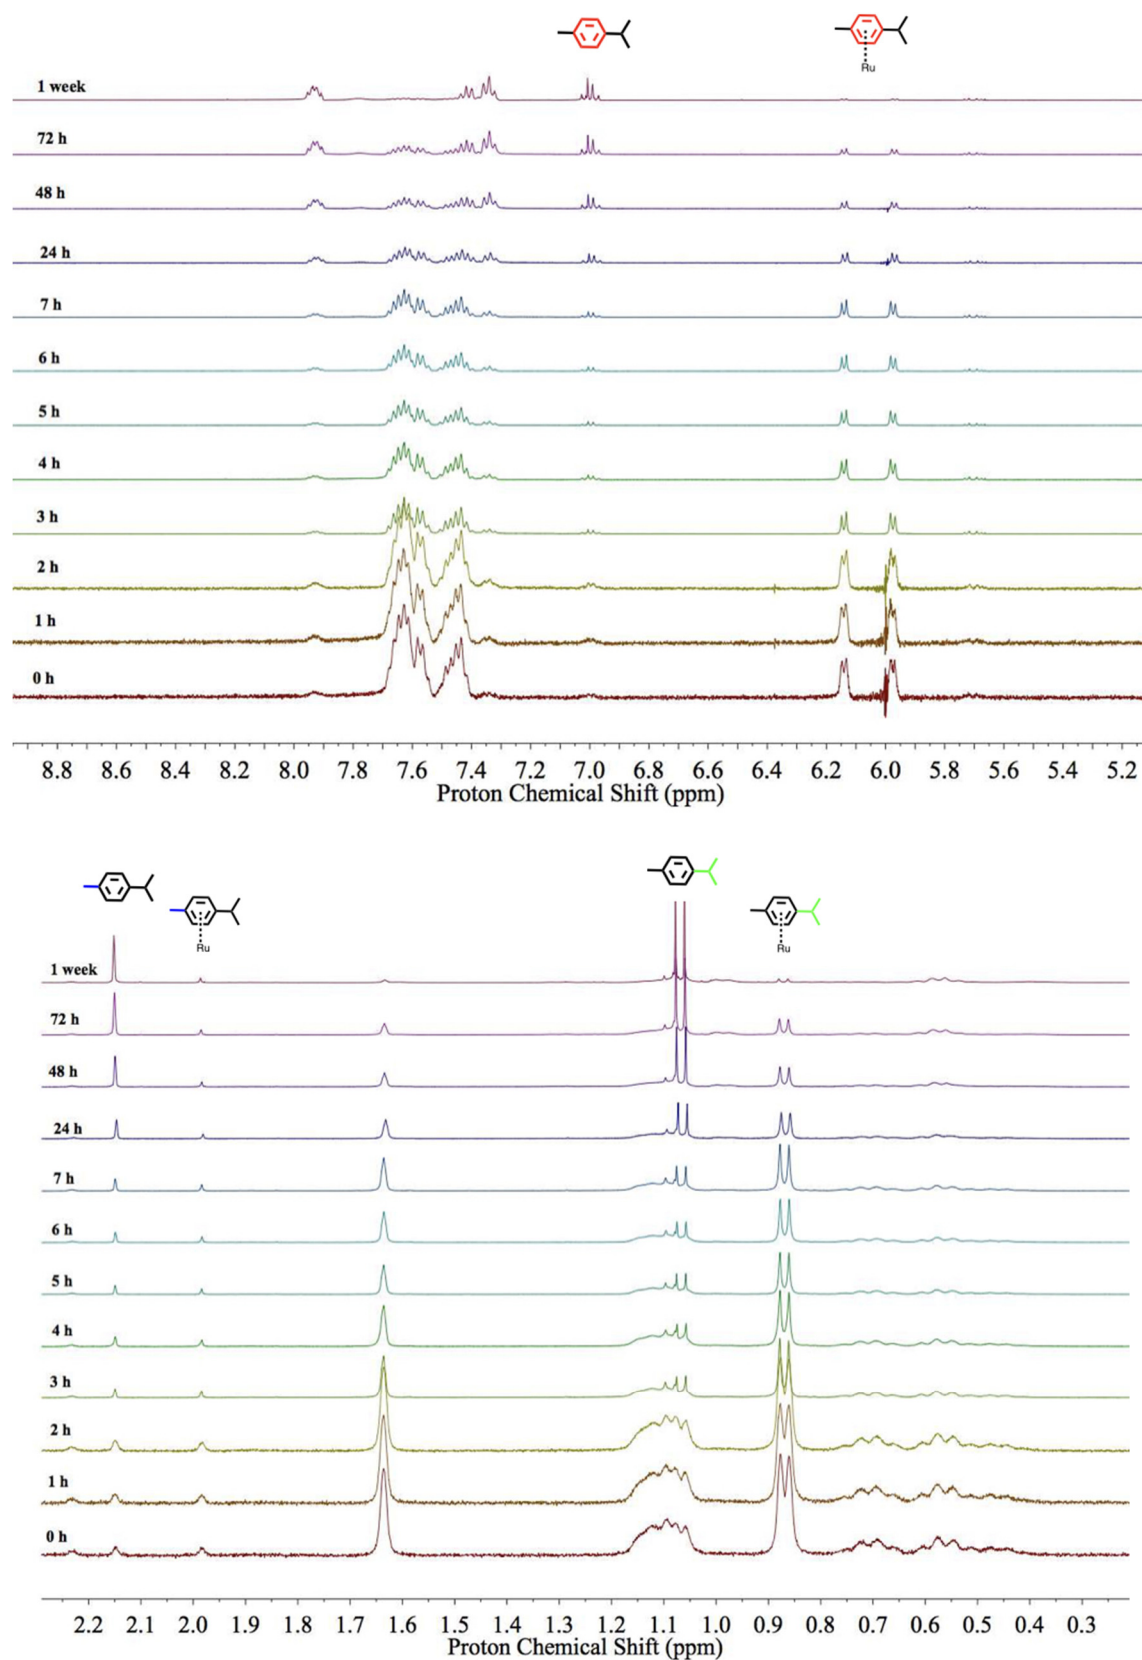

**Figure S6.** Selected  $^1\text{H}$  spectra at different time of Complex  $\text{Ru3}$  ( $[\text{RuCl}(\text{p-cym})\{\text{Ph}_2\text{P}\}_2\text{N}\{\text{C}_6\text{H}_{11}\}][\text{BF}_4]$ ) in  $\text{DMSO-d}_6$ . Selected region for aromatic and aliphatic, respectively, at different time of complex  $\text{Ru3}$ .

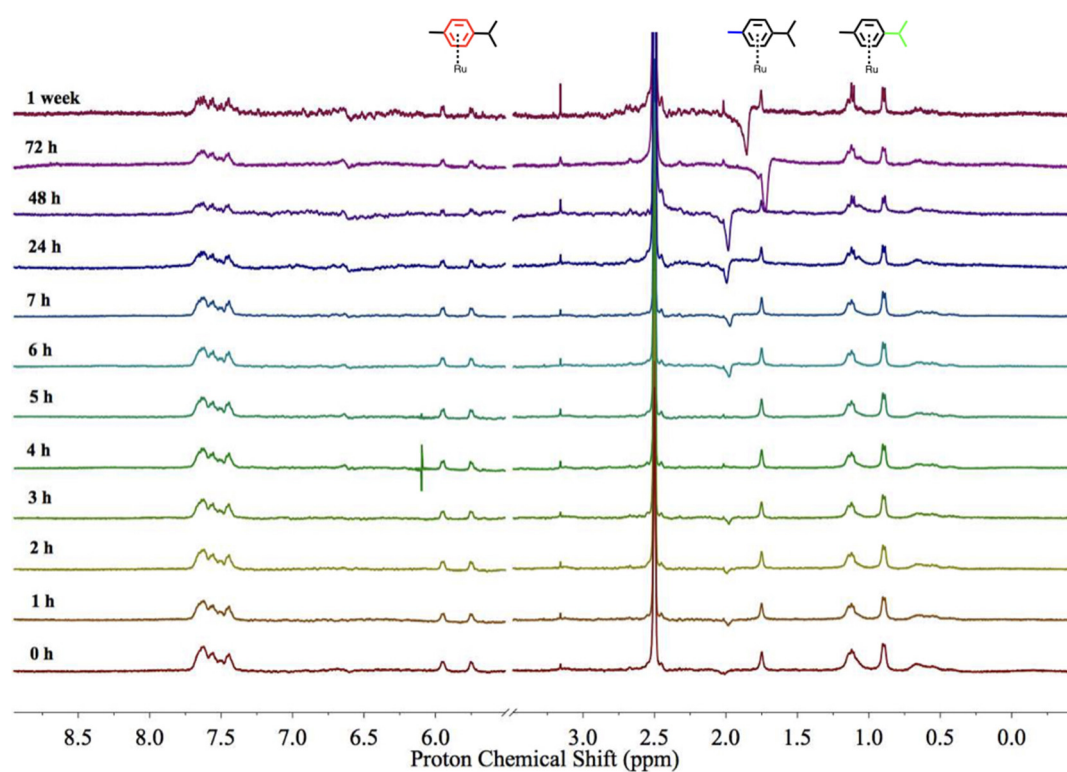

**Figure S7.** Selected  $^1\text{H}$  spectra at different time of Complex *Ru3* ( $[\text{RuCl}(\text{p-cym})((\text{Ph}_2\text{P})_2\text{N}\{\text{C}_6\text{H}_{11}\})][\text{BF}_4]$ ) in  $\text{DMSO-d}_6:\text{D}_2\text{O}$  / 1:3.

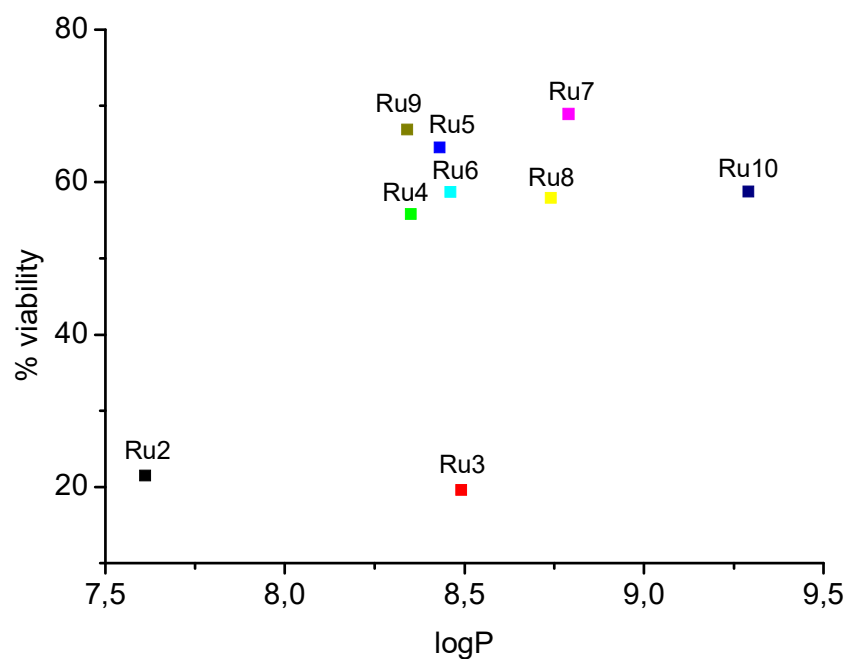

**Figure S8.** Graph of %viability obtained from the MTT experiment vs logP.

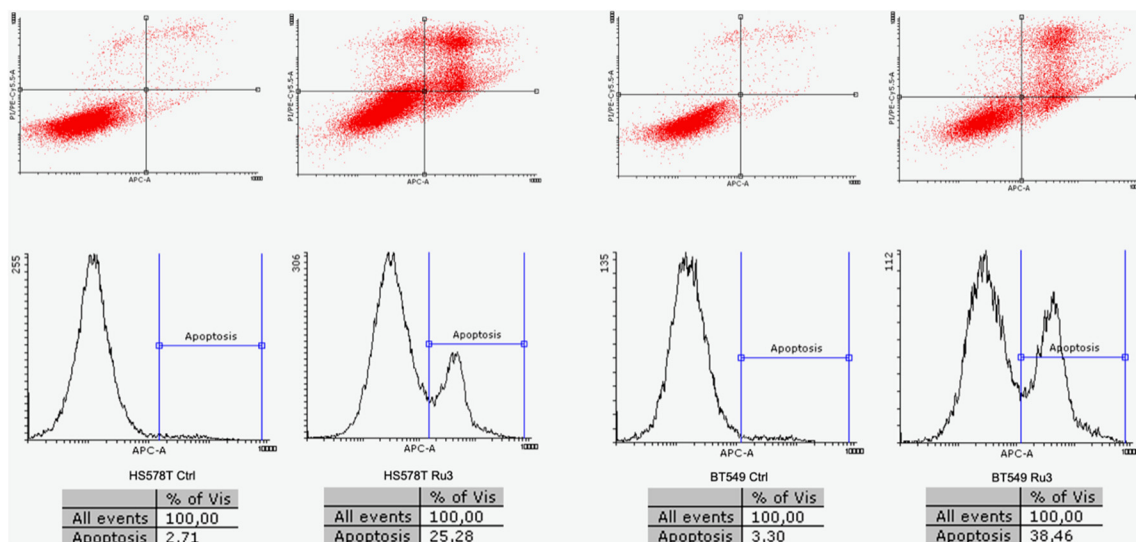

**Figure S9.** FACS Plot for HS578T and BT549.

**Table S1.** Principal bond distances and angles for compound *Ru3*.

| Bond distances   | Bond angles          |
|------------------|----------------------|
| Ru1 C3 2.240(16) | C3 Ru1 P2 159.3(5)   |
| Ru1 C5 2.249(17) | C5 Ru1 P2 125.3(5)   |
| Ru1 C1 2.261(14) | C1 Ru1 P2 101.3(4)   |
| Ru1 C6 2.265(14) | C6 Ru1 P2 100.7(4)   |
| Ru1 C2 2.273(15) | C2 Ru1 P2 124.7(4)   |
| Ru1 P2 2.296(4)  | P2 Ru1 C4 160.5(7)   |
| Ru1 C4 2.299(12) | C3 Ru1 P1 130.2(5)   |
| Ru1 P1 2.343(4)  | C5 Ru1 P1 102.8(5)   |
| Ru1 Cl1 2.383(3) | C1 Ru1 P1 155.8(5)   |
|                  | C6 Ru1 P1 122.1(4)   |
|                  | C2 Ru1 P1 164.4(4)   |
|                  | P2 Ru1 P1 68.42(13)  |
|                  | C4 Ru1 P1 105.3(5)   |
|                  | P2 Ru1 Cl1 85.90(13) |
|                  | P1 Ru1 Cl1 87.71(14) |

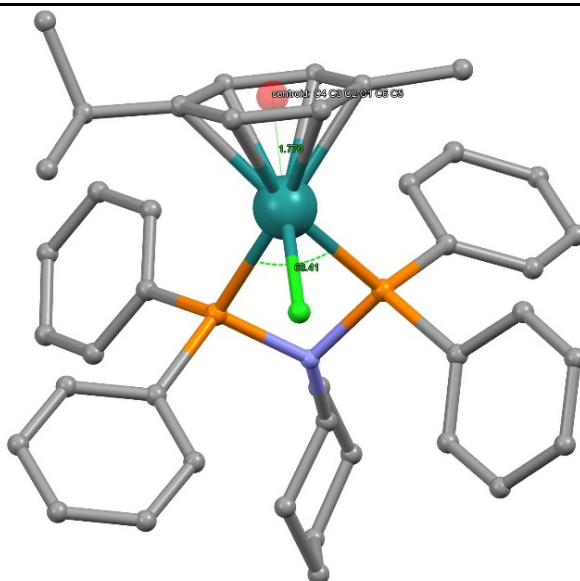

**Table S2.** Crystal data and structure refinement for compound Ru3.

| Compound                                                                                                                                                                                                                                                                                                                                                                                                                                                                                                                                                                                                                                                                                    | Ru3                                                                  |
|---------------------------------------------------------------------------------------------------------------------------------------------------------------------------------------------------------------------------------------------------------------------------------------------------------------------------------------------------------------------------------------------------------------------------------------------------------------------------------------------------------------------------------------------------------------------------------------------------------------------------------------------------------------------------------------------|----------------------------------------------------------------------|
| Formula                                                                                                                                                                                                                                                                                                                                                                                                                                                                                                                                                                                                                                                                                     | C <sub>40</sub> H <sub>45</sub> BClF <sub>4</sub> NP <sub>2</sub> Ru |
| <i>M</i>                                                                                                                                                                                                                                                                                                                                                                                                                                                                                                                                                                                                                                                                                    | 825.04                                                               |
| <i>CCDC</i>                                                                                                                                                                                                                                                                                                                                                                                                                                                                                                                                                                                                                                                                                 | 2076579                                                              |
| Crystal System                                                                                                                                                                                                                                                                                                                                                                                                                                                                                                                                                                                                                                                                              | Monoclinic                                                           |
| Space group                                                                                                                                                                                                                                                                                                                                                                                                                                                                                                                                                                                                                                                                                 | <i>P</i> 2 <sub>1</sub>                                              |
| <i>T</i> [K]                                                                                                                                                                                                                                                                                                                                                                                                                                                                                                                                                                                                                                                                                | 300                                                                  |
| <i>a</i> [Å]                                                                                                                                                                                                                                                                                                                                                                                                                                                                                                                                                                                                                                                                                | 10.3904(16)                                                          |
| <i>b</i> [Å]                                                                                                                                                                                                                                                                                                                                                                                                                                                                                                                                                                                                                                                                                | 18.4721(15)                                                          |
| <i>c</i> [Å]                                                                                                                                                                                                                                                                                                                                                                                                                                                                                                                                                                                                                                                                                | 10.7238(9)                                                           |
| $\beta$ [deg]                                                                                                                                                                                                                                                                                                                                                                                                                                                                                                                                                                                                                                                                               | 104.915(4)                                                           |
| <i>V</i> [Å <sup>3</sup> ]                                                                                                                                                                                                                                                                                                                                                                                                                                                                                                                                                                                                                                                                  | 1988.9(3)                                                            |
| <i>Z</i>                                                                                                                                                                                                                                                                                                                                                                                                                                                                                                                                                                                                                                                                                    | 2                                                                    |
| Density [gcm <sup>-3</sup> ]                                                                                                                                                                                                                                                                                                                                                                                                                                                                                                                                                                                                                                                                | 1.378                                                                |
| $\mu$ [mm <sup>-1</sup> ]                                                                                                                                                                                                                                                                                                                                                                                                                                                                                                                                                                                                                                                                   | 0.589                                                                |
| Observed reflections                                                                                                                                                                                                                                                                                                                                                                                                                                                                                                                                                                                                                                                                        | 19228                                                                |
| <i>R</i> <sub>int</sub>                                                                                                                                                                                                                                                                                                                                                                                                                                                                                                                                                                                                                                                                     | 0.0964                                                               |
| <i>R</i> <sub>1</sub> <sup>b</sup> / <i>wR</i> <sub>2</sub> <sup>c</sup> [I>2σ(I)]                                                                                                                                                                                                                                                                                                                                                                                                                                                                                                                                                                                                          | 0.0489 / 0.1151                                                      |
| <i>R</i> <sub>1</sub> <sup>b</sup> / <i>wR</i> <sub>2</sub> <sup>c</sup> (all data)                                                                                                                                                                                                                                                                                                                                                                                                                                                                                                                                                                                                         | 0.0635 / 0.1279                                                      |
| <i>GoF</i>                                                                                                                                                                                                                                                                                                                                                                                                                                                                                                                                                                                                                                                                                  | 1.132                                                                |
| [a] <i>S</i> = [Σ <i>w</i> ( <i>F</i> <sub>0</sub> <sup>2</sup> - <i>F</i> <sub>c</sub> <sup>2</sup> ) / (N <sub>obs</sub> - N <sub>param</sub> )] <sup>1/2</sup> [b] <i>R</i> <sub>1</sub> = Σ   <i>F</i> <sub>0</sub>   -   <i>F</i> <sub>c</sub>    / Σ  <i>F</i> <sub>0</sub>   [c] <i>wR</i> <sub>2</sub> = [Σ <i>w</i> ( <i>F</i> <sub>0</sub> <sup>2</sup> - <i>F</i> <sub>c</sub> <sup>2</sup> ) / Σ <i>wF</i> <sub>0</sub> <sup>2</sup> ] <sup>1/2</sup> <i>w</i> = 1/[σ <sup>2</sup> ( <i>F</i> <sub>0</sub> <sup>2</sup> ) + ( <i>aP</i> ) <sup>2</sup> + <i>bP</i> ] where <i>P</i> = (max( <i>F</i> <sub>0</sub> <sup>2</sup> , 0) + 2 <i>F</i> <sub>c</sub> <sup>2</sup> )/3. |                                                                      |

**Table S3.** Stability of Ru1-Ru10 in DMSO-d<sub>6</sub> monitoring by <sup>1</sup>H-NMR.

| Complexes | 50% degradation | Full degradation |
|-----------|-----------------|------------------|
| Ru1       | 6h              | 1 week           |
| Ru2       | 24h             | 1 week           |
| Ru3       | 7h              | 1 week           |
| Ru4       | 7h              | 72h              |
| Ru5       | 24h             | 1 week           |
| Ru6       | 7h              | 72h              |
| Ru7       | 5h              | 48h              |
| Ru8       | 3h              | 48h              |
| Ru9       | -               | -                |
| Ru10      | 3-4h            | 48h              |

**Table S4.** Binding parameters (±2σ) obtained for the interaction of Ru3 and Ru8 with HSA compared to Ru0.

| COMP. | BIOMOL. | <i>K</i> <sub>a</sub> × 10 <sup>-4</sup> (230nm) | <i>K</i> <sub>a</sub> × 10 <sup>-4</sup> (278nm) | <i>K</i> <sub>b</sub> × 10 <sup>-4</sup> | <i>K</i> <sub>sv</sub> × 10 <sup>-4</sup> | <i>n</i>    |
|-------|---------|--------------------------------------------------|--------------------------------------------------|------------------------------------------|-------------------------------------------|-------------|
| Ru0   | HSA     | 16.2 ± 5.96                                      | -                                                | -                                        | 0.32 ± 0.10                               | 1.11 ± 0.21 |
| Ru3   | HSA     | 3.37 ± 0.38                                      | 1.28 ± 0.43                                      | 4.02 ± 0.73                              | 2.51 ± 0.26                               | 1.05 ± 0.02 |
| Ru8   | HSA     | 4.25 ± 0.99                                      | -                                                | 0.20 ± 0.002                             | 2.04 ± 0.90                               | 0.81 ± 0.07 |

**Table S5.** IC<sub>50</sub> values for the most active compounds Ru0, Ru2 and Ru3, and the ligands in every cell line used.

| Cell Line | IC <sub>50</sub> (nM) |     |     |       |
|-----------|-----------------------|-----|-----|-------|
|           | Ru0                   | Ru2 | Ru3 | L1-L9 |
| HACAT     | -                     | -   | 350 | >1000 |
| MCF7      | 300                   | 45  | 15  | >1000 |
| T47D      | 450                   | 60  | 10  | >1000 |
| HS578T    | -                     | -   | 250 | >1000 |
| BT549     | -                     | -   | 45  | >1000 |
| SKBR3     | 700                   | 80  | 60  | >1000 |
| BT474     | 800                   | 180 | 120 | >1000 |
| OVCAR8    | -                     | -   | 300 | >1000 |
| SKOV3     | -                     | -   | 170 | >1000 |
